# Supplementary material
Source: PubMed Central journal article supplement (PMC10425564)
Supplement: NIHMS1863205-supplement-fS2.pdf [file NIHMS1863205-supplement-fS2.pdf]

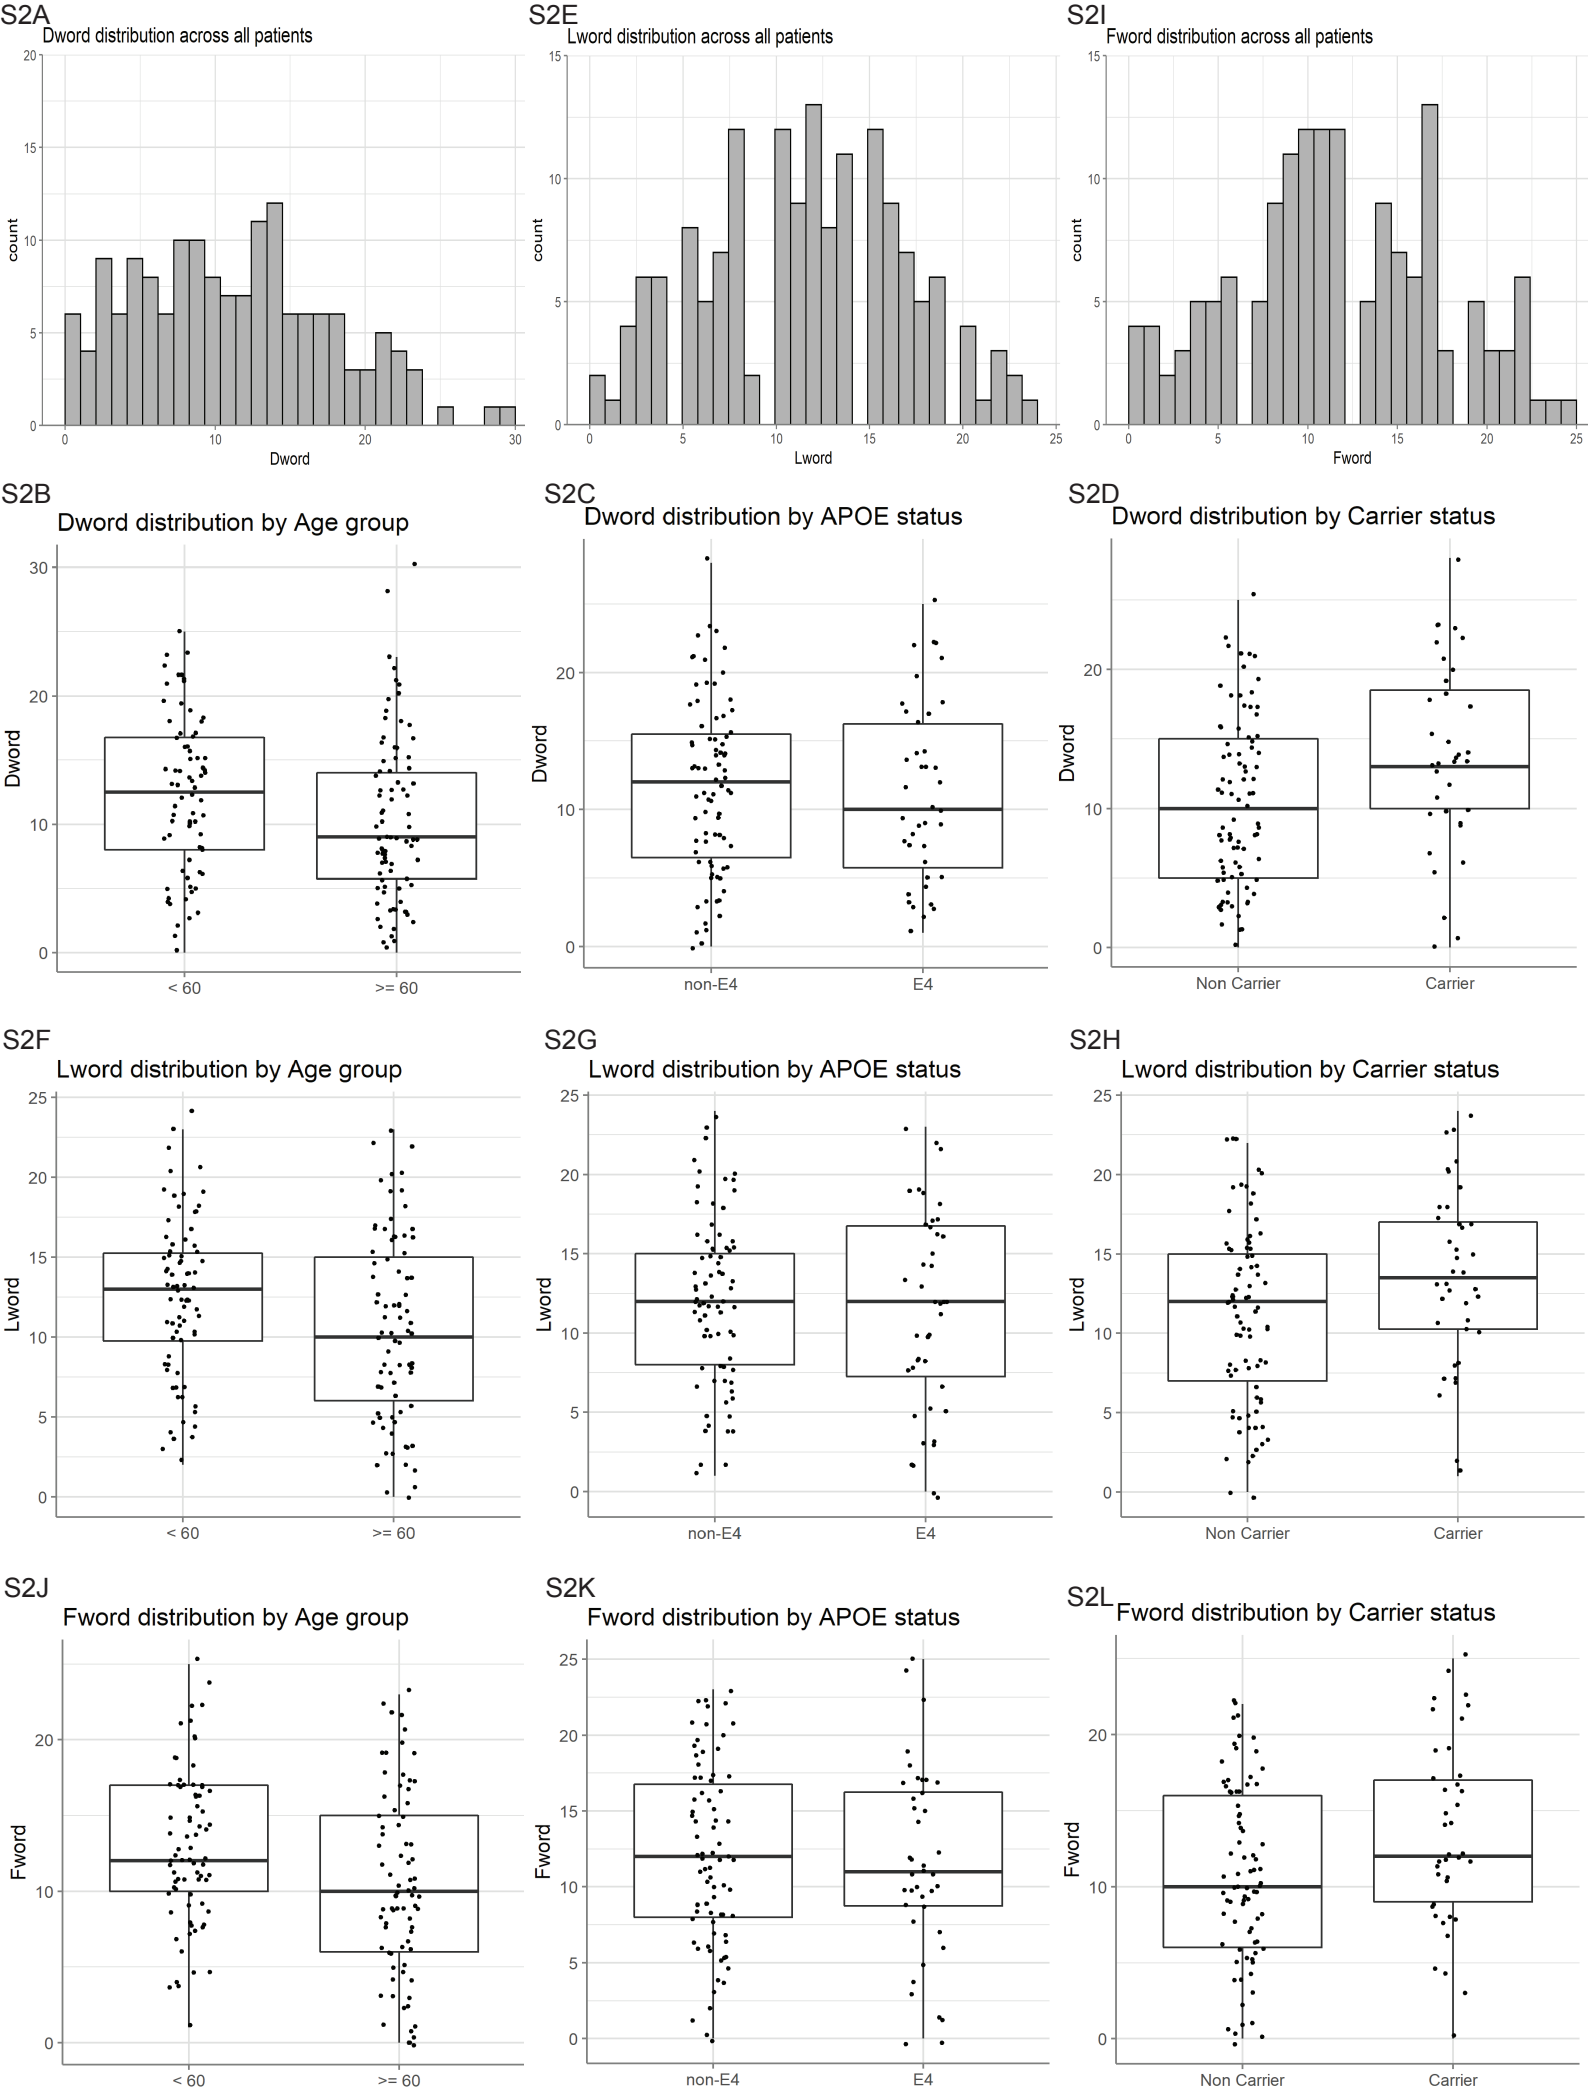

Supplementary Figure 2: Verbal Fluency Distributions

Fig[S2A-D]: Distribution of D-Words Verbal Fluency overall (A), by age (B), APOE status (C), and genetic carrier status (D).

Fig[S2E-H]: Distribution of L-Words Verbal Fluency overall (E), by age (F), APOE status (G), and genetic carrier status (H).

Fig[S2I-L]: Distribution of F-Words Verbal Fluency overall (I), by age (J), APOE status (K), and genetic carrier status (L).
